# Supplementary material for: Explorations on Thermodynamic and Kinetic Performances of Various Cationic Exchange Durations for Synthetic Clinoptilolite
Source: MDPI journal article supplement (doi:10.3390/molecules27082597), 2022-04-18
Supplement: s1 [file s1]

**Explorations on thermodynamic and kinetic performances of various cationic  
exchange durations for synthetic clinoptilolite**

Keling Wang, Bingying Jia, Yehong Li, Jihong Sun\*, Xia Wu\*

Beijing Key Laboratory for Green Catalysis and Separation, Department of  
Environmental and Chemical Engineering, Beijing University of Technology, Beijing,  
100124, China

**Electronic Supplementary Information**

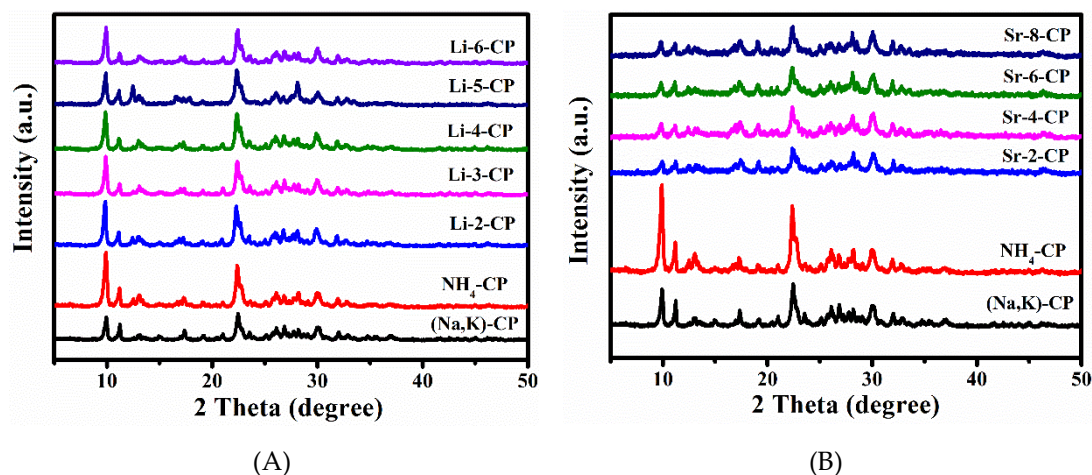

**Figure S1.** XRD patterns of Li-x-CP (A) and Sr-x-CP (B).

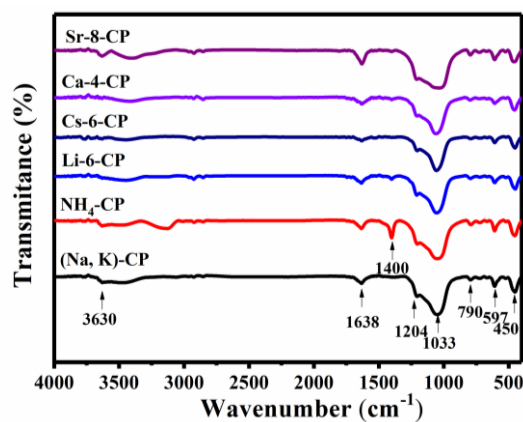

**Figure S2.** FT-IR spectra of various CPs.

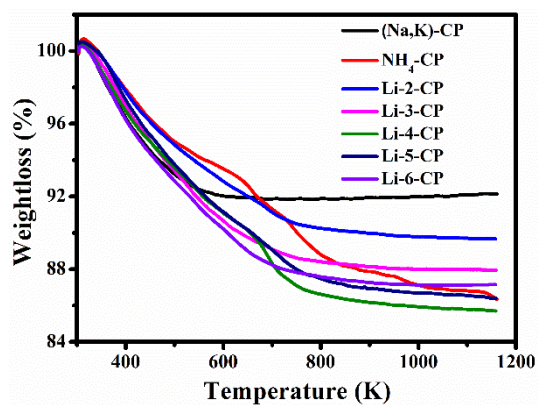

(A)

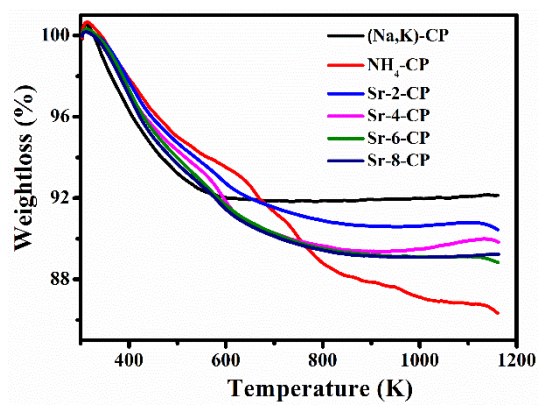

(B)

**Figure S3.** TG profiles of Li-x-CP (A) and Sr-x-CP (B).

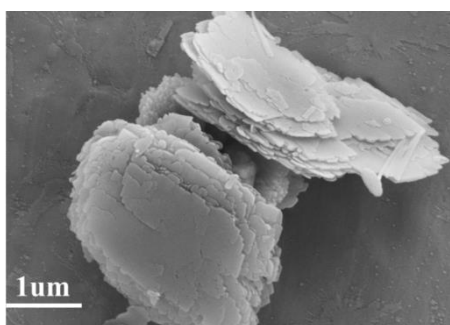

(A)

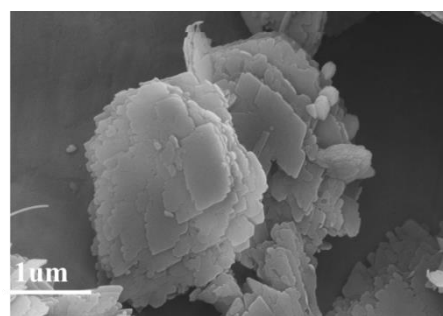

(B)

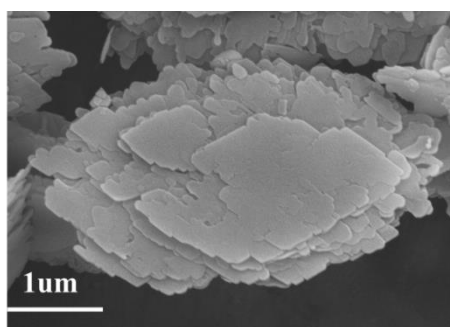

(C)

**Figure S4.** SEM images of (Na, K)-CP (A), Cs-6-CP (B), and Ca-4-CP (C).

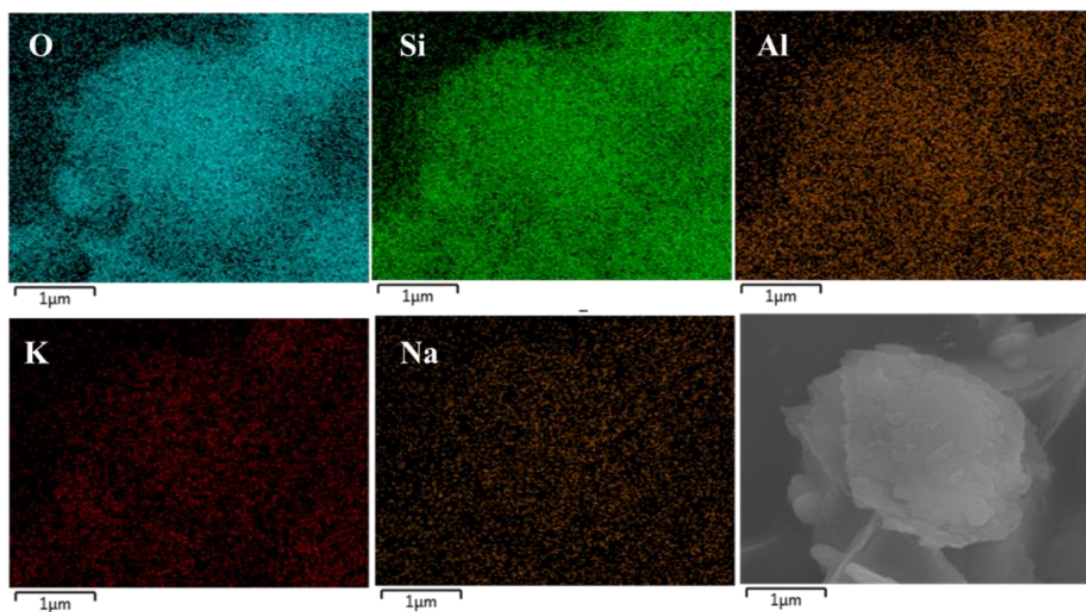

**Figure S5.** SEM elemental mappings of (Na, K)-CP.

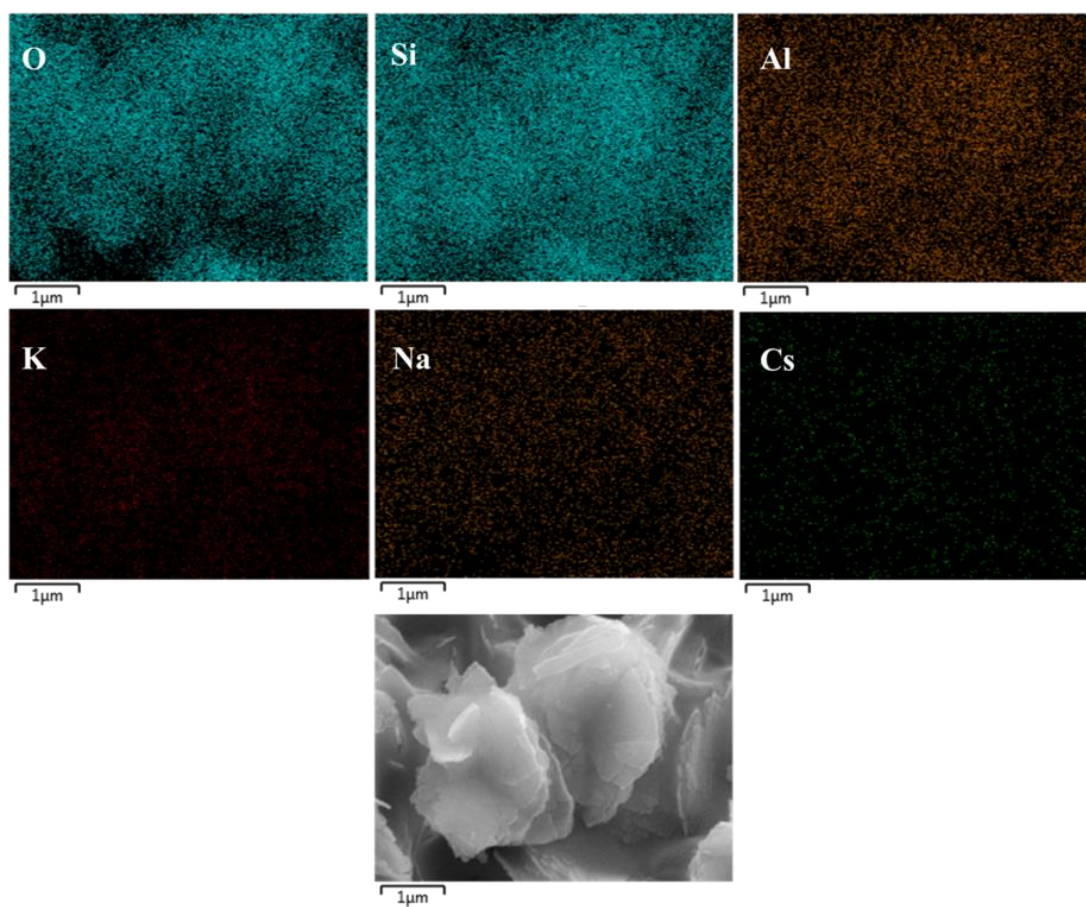

**Figure S6.** SEM elemental mappings of Cs-6-CP.



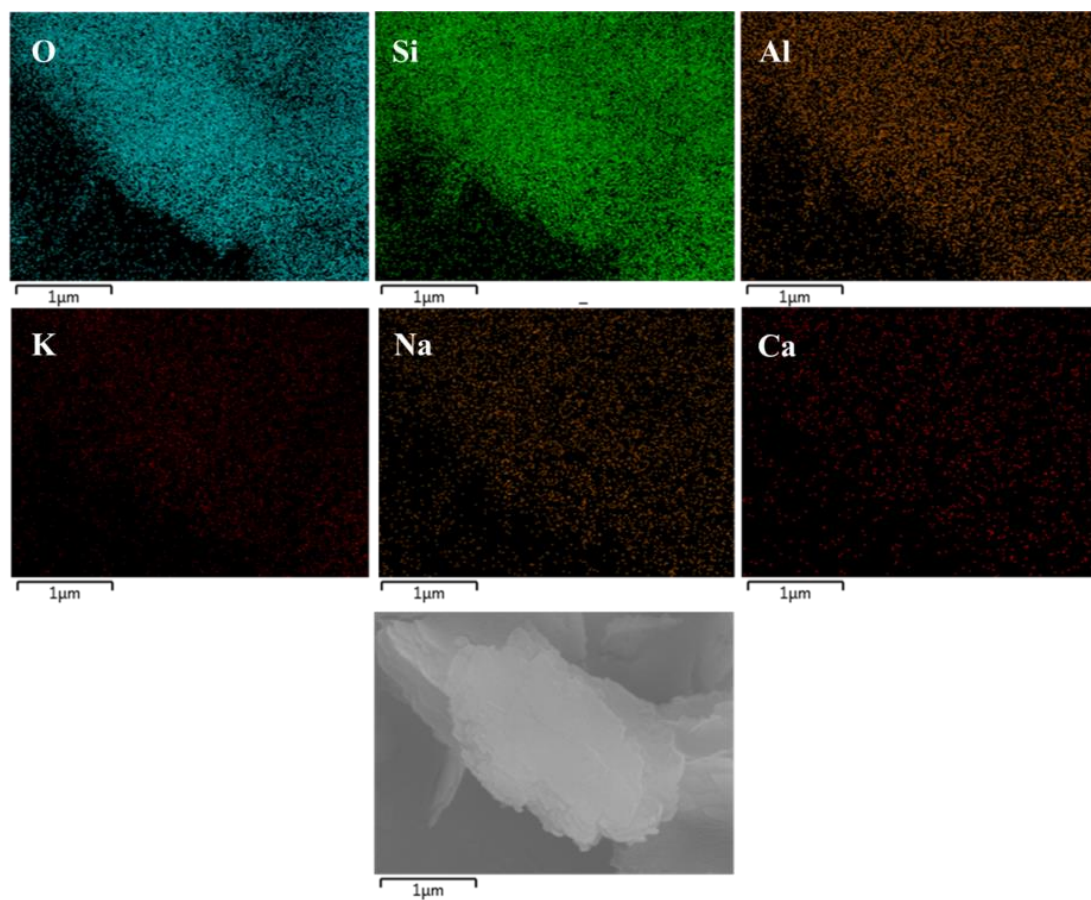

**Figure S7.** SEM elemental mappings of Ca-4-CP.

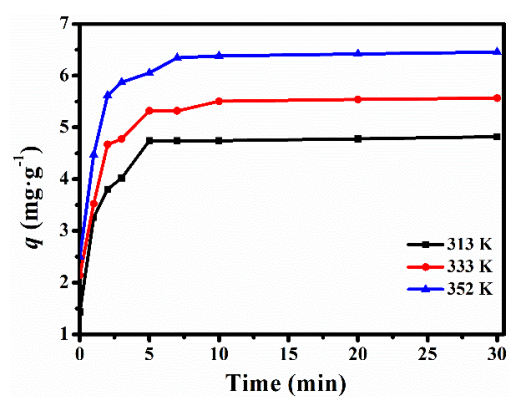

(A)

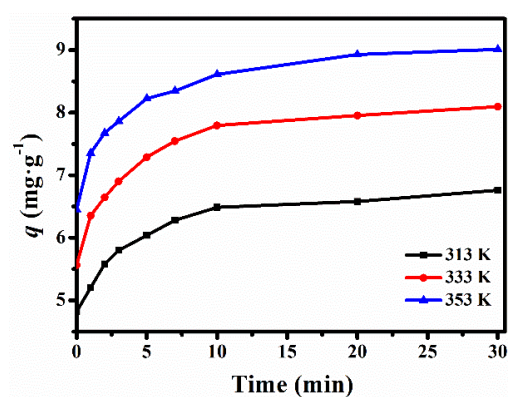

(B)

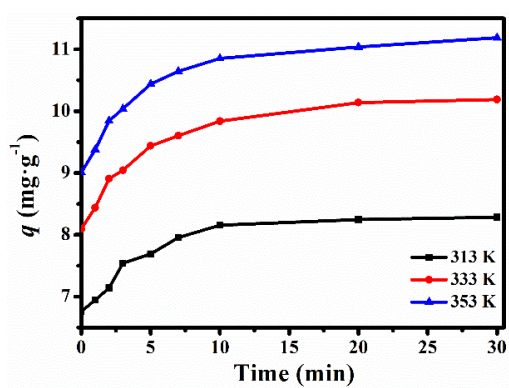

(C)

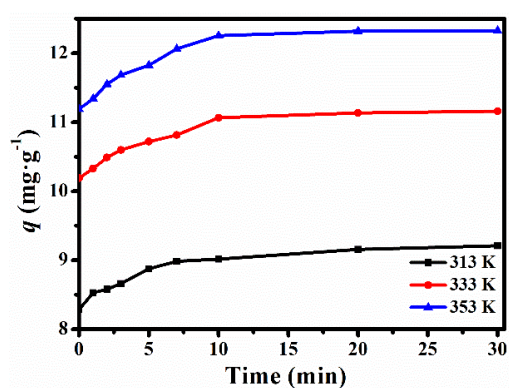

(D)

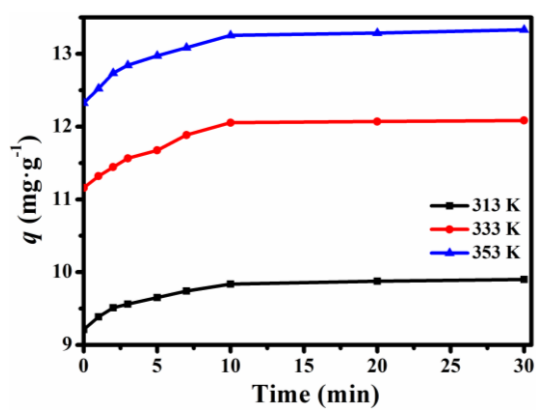

(E)

**Figure S8.** Exchanged kinetic curves of Li-x-CP at 313 K, 333 K, and 353 K. x = 2 (A), 3 (B), 4 (C), 5 (D), and 6 (E).

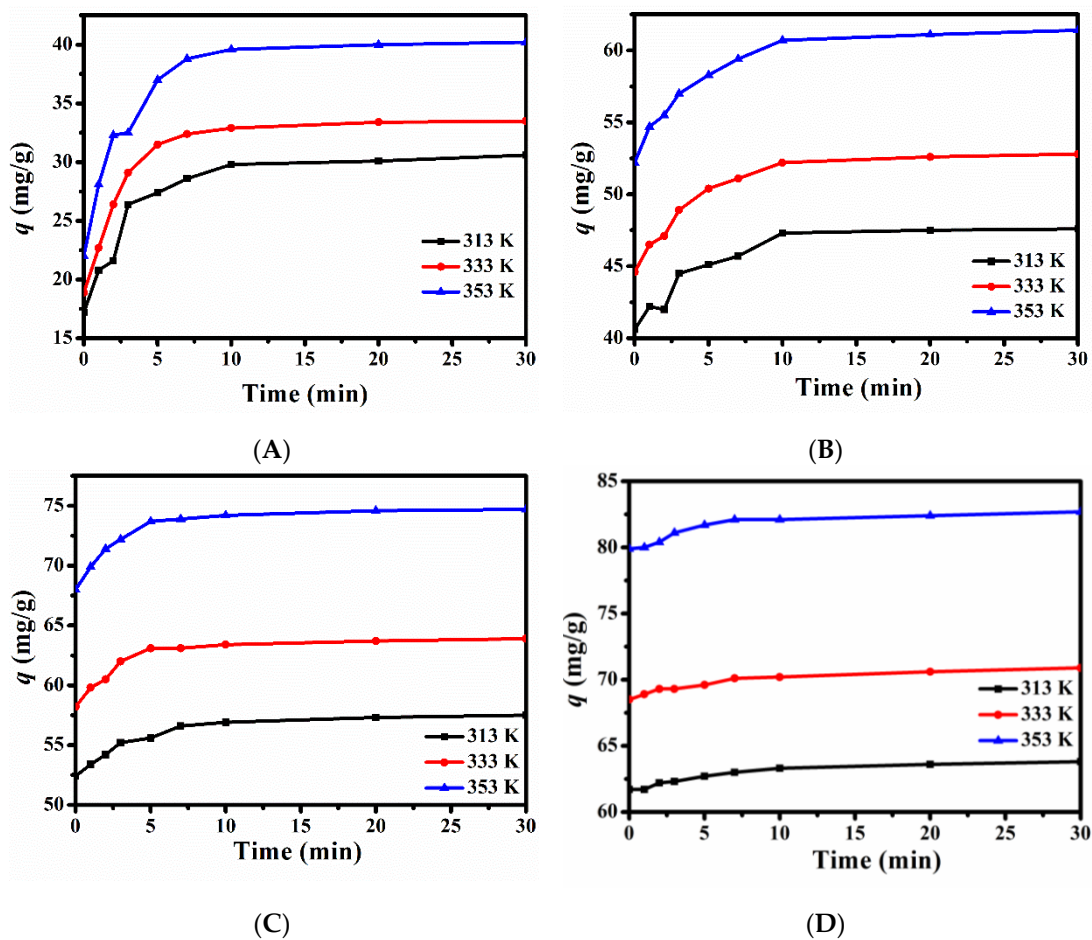

**Figure S9.** Exchanged kinetic curves of Sr- $x$ -CP at 313 K, 333 K, and 353 K.  $x = 2$  (A), 4 (B), 6 (C), and 8 (D).

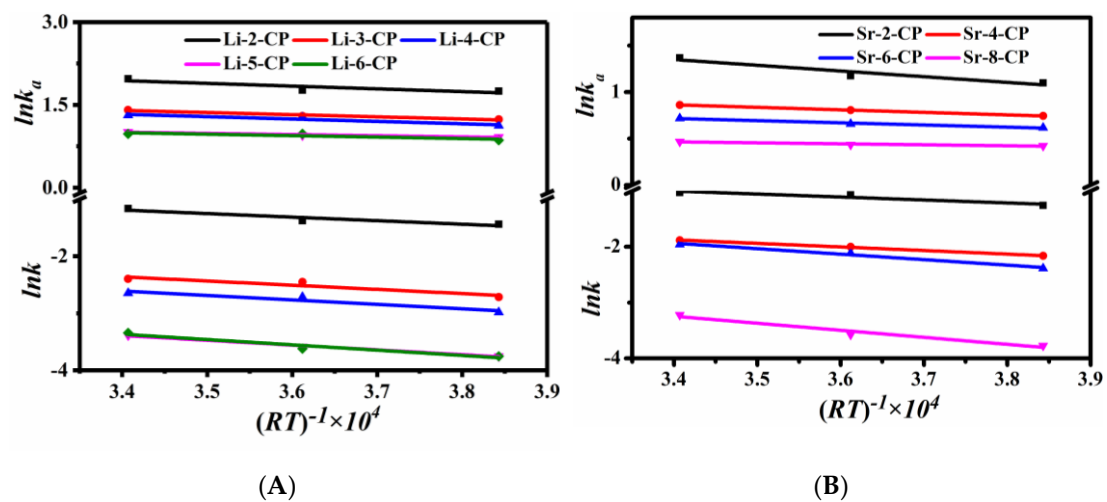

**Figure S10.** Relationship between  $\ln k_a$  and  $(RT)^{-1} \times 10^4$ , as well as  $\ln k$  and  $(RT)^{-1} \times 10^4$  for Li- $x$ -CP (A) and Sr- $x$ -CP (B).

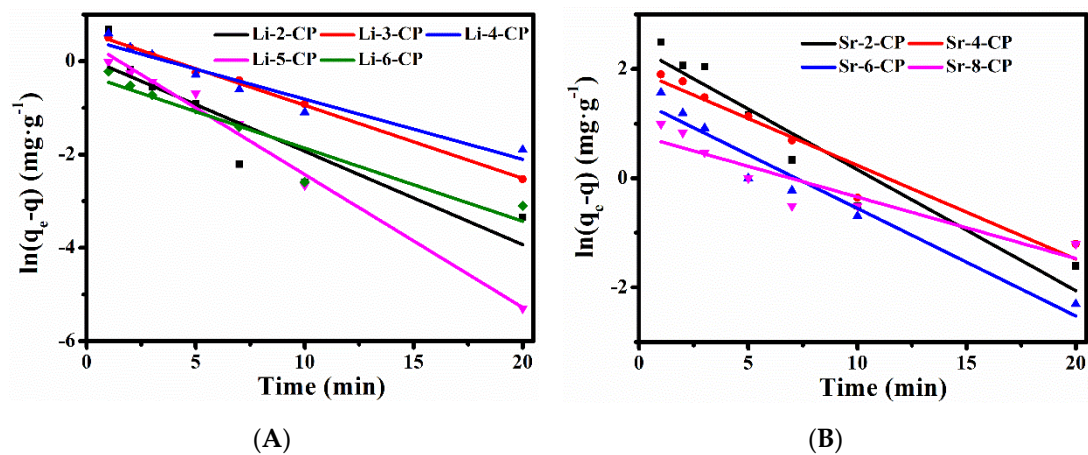

**Figure S11.** Pseudo-first-order model fit for Li-x-CP (A) and Sr-x-CP (B).

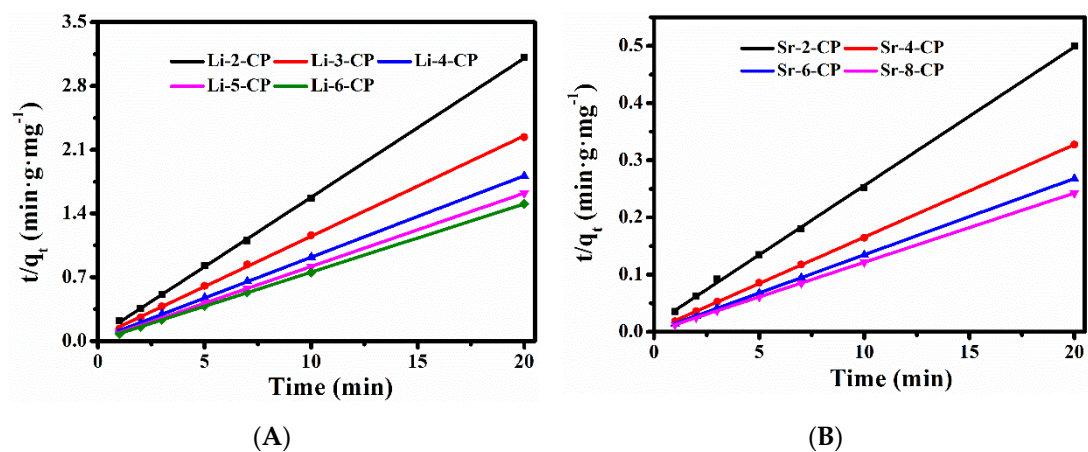

**Figure S12.** Pseudo-second-order model fit for Li-x-CP (A) and Sr-x-CP (B).



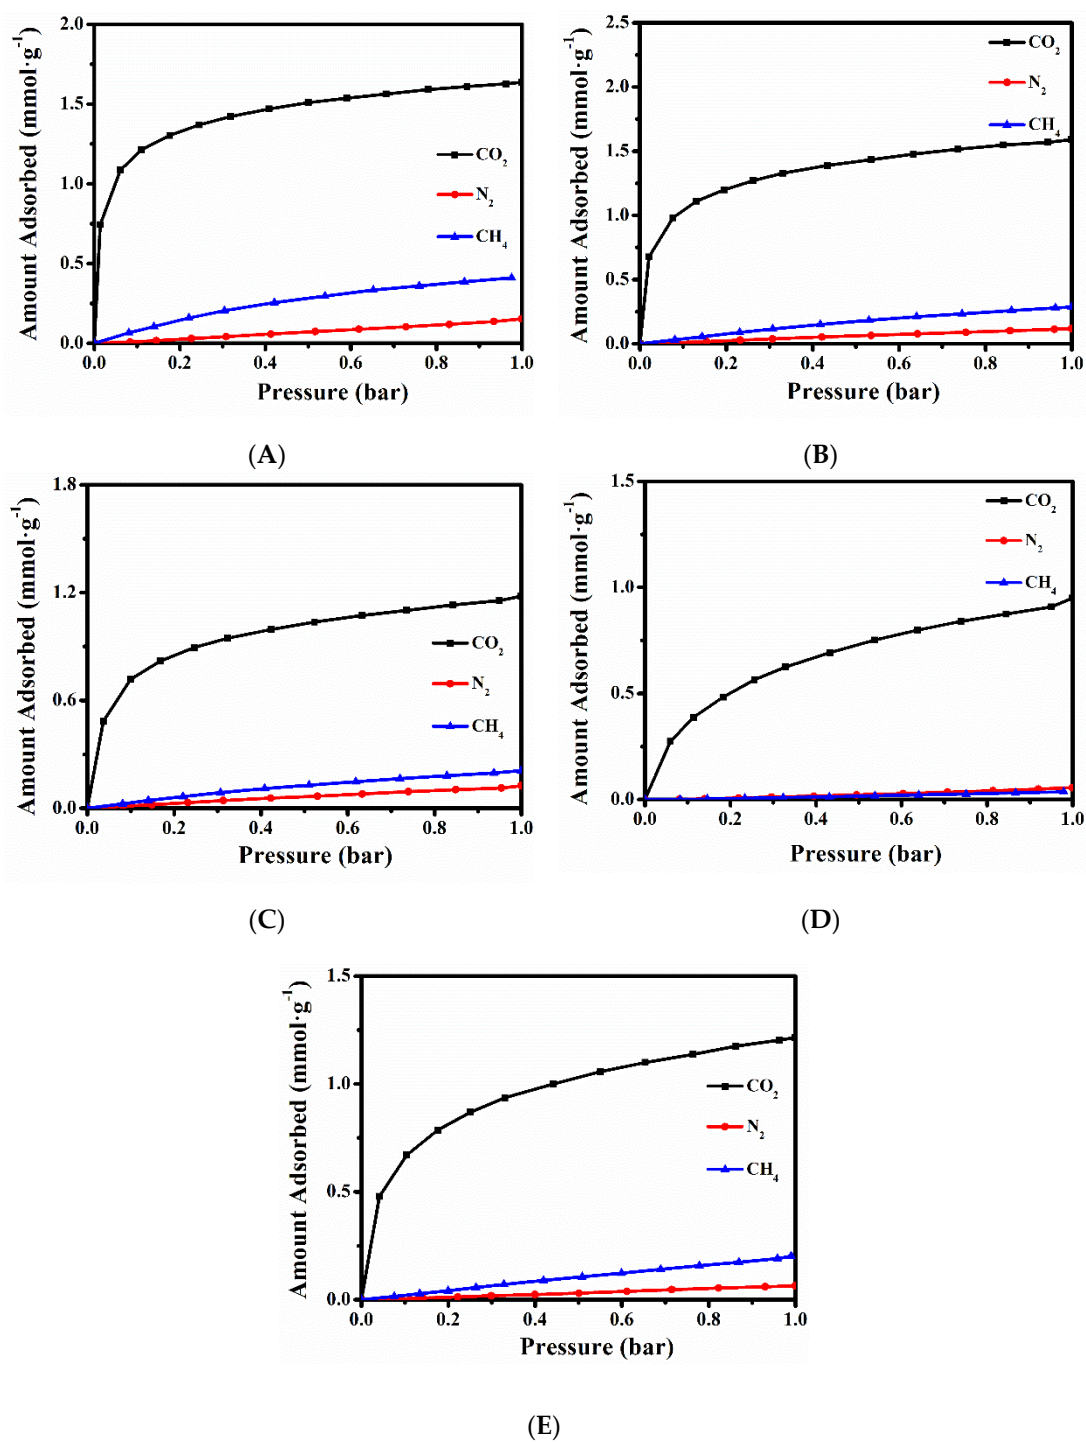

**Figure S13.** Adsorbed isotherms of (Na, K)-CP (A), Li-6-CP (B), Cs-6-CP (C), Ca-4-CP (D), and Sr-8-CP (E) using CO<sub>2</sub>, N<sub>2</sub> and CH<sub>4</sub> as adsorbate at 298 K.



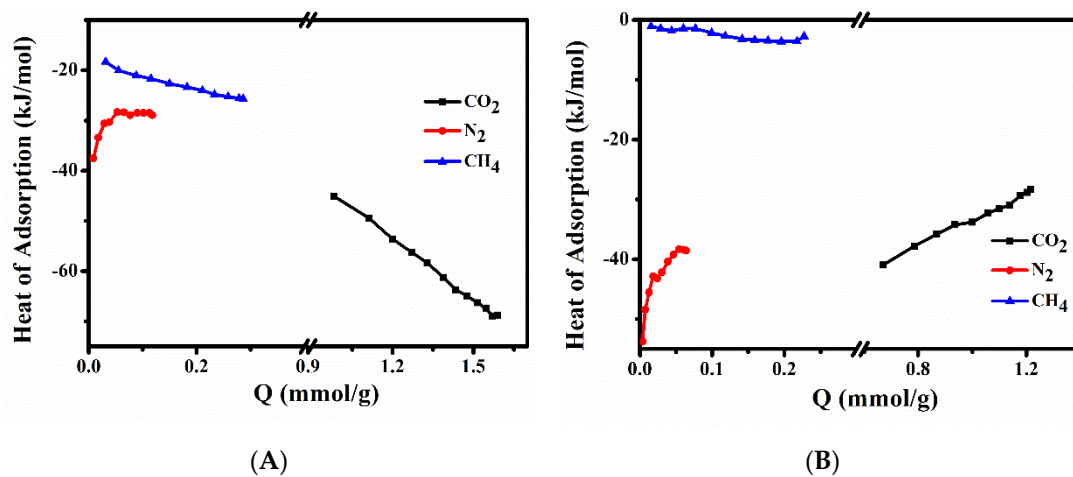

**Figure S14.** Adsorption heat of CO<sub>2</sub>, N<sub>2</sub> and CH<sub>4</sub> of Li-6-CP (A) and Sr-8-CP (B).

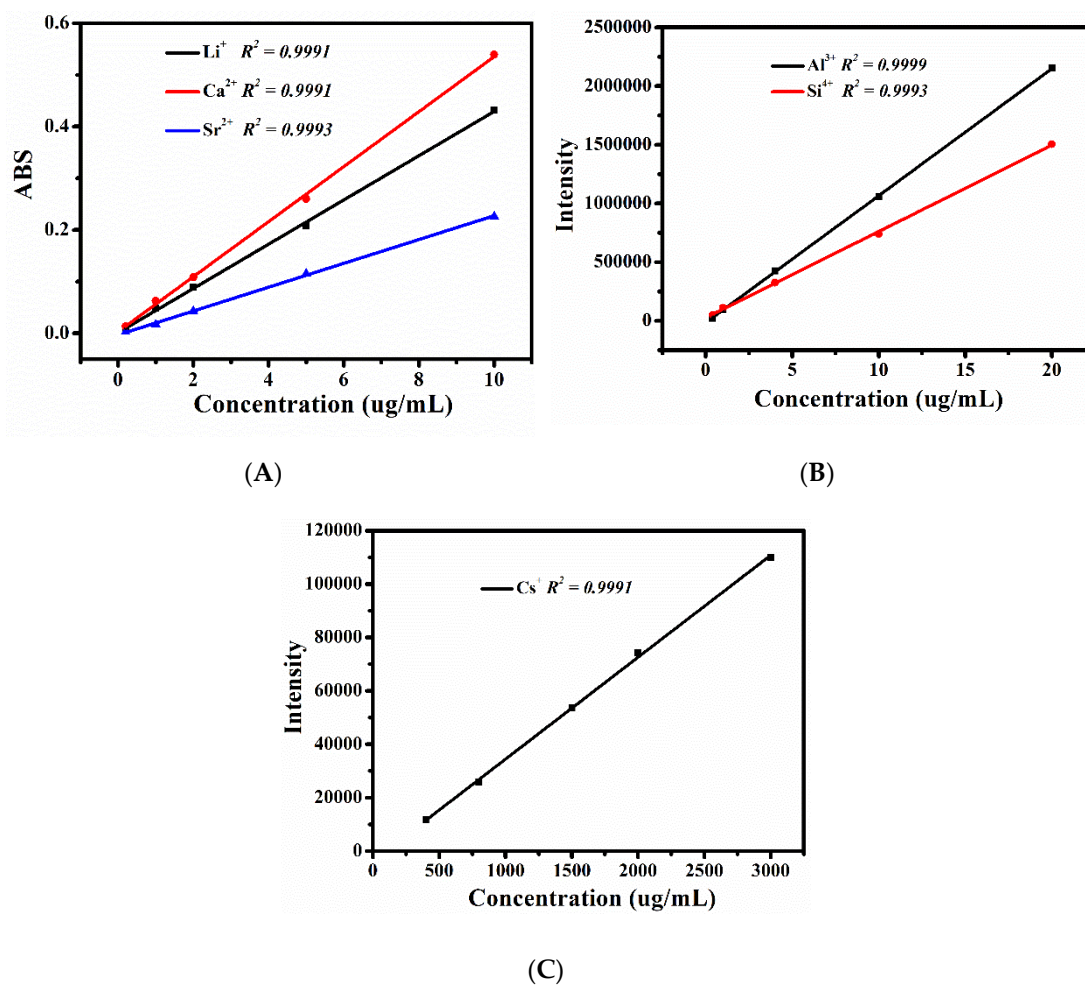

**Figure S15.** The standard curves of Li<sup>+</sup>, Ca<sup>2+</sup>, Sr<sup>2+</sup> (A), Al<sup>3+</sup>, Si<sup>4+</sup> (B), and Cs<sup>+</sup> (C).

**Table S1.** Summaries for the  $d$  (nm) spacing values of the obtained M-x-CPs corresponding to different spatial planes.

| Samples             | <i>020</i> | <i>200</i> | <i>111</i> | <i>13-1</i> | <i>131</i> | <i>22-2</i> | <i>42-2</i> | <i>151</i> | <i>530</i> | <i>061</i> |
|---------------------|------------|------------|------------|-------------|------------|-------------|-------------|------------|------------|------------|
| CP                  | 8.909      | 7.892      | 5.104      | 4.637       | 3.959      | 3.402       | 3.160       | 2.970      | 2.796      | 2.725      |
| NH <sub>4</sub> -CP | 8.927      | 7.909      | 5.132      | 4.648       | 3.976      | 3.414       | 3.162       | 2.980      | 2.800      | 2.734      |
| Li-2-CP             | 8.982      | 7.963      | 5.133      | 4.666       | 3.976      | 3.427       | 3.173       | 2.988      | 2.802      | 2.728      |
| Li-3-CP             | 8.946      | 7.950      | 5.139      | 4.651       | 3.979      | 3.416       | 3.175       | 2.965      | 2.801      | 2.730      |
| Li-4-CP             | 8.927      | 7.907      | 5.109      | 4.633       | 3.963      | 3.411       | 3.166       | 2.974      | 2.799      | 2.730      |
| Li-5-CP             | 8.984      | 7.953      | 5.145      | 4.649       | 3.983      | 3.429       | 3.175       | 2.988      | 2.807      | 2.730      |
| Li-6-CP             | 8.962      | 7.907      | 5.105      | 4.642       | 3.973      | 3.414       | 3.166       | 2.984      | 2.803      | 2.735      |
| Cs-2-CP             | 9.055      | 7.996      | 5.169      |             | 4.005      | 3.432       | 3.173       | 2.996      | 2.817      | 2.743      |
| Cs-3-CP             |            | 8.025      |            |             | 4.005      | 3.432       | 3.177       | 3.002      | 2.819      | 2.746      |
| Cs-4-CP             | 9.020      | 8.065      |            |             | 4.004      | 3.438       | 3.177       | 3.013      |            | 2.746      |
| Cs-5-CP             | 9.157      | 8.007      | 5.164      | 4.709       | 4.001      | 3.435       | 3.179       | 2.998      |            | 2.751      |
| Cs-6-CP             |            | 8.025      |            |             | 4.005      | 3.432       | 3.177       | 3.002      | 2.819      | 2.746      |
| Ca-2-CP             | 8.983      | 7.937      | 5.121      | 4.661       | 3.973      | 3.424       | 3.182       | 2.961      | 2.797      | 2.730      |
| Ca-3-CP             | 8.965      | 7.922      | 5.115      | 4.649       | 3.973      | 3.422       | 3.173       | 2.963      | 2.796      | 2.726      |
| Ca-4-CP             | 8.944      | 7.906      | 5.082      | 4.647       | 3.952      | 3.411       | 3.169       | 2.961      | 2.787      | 2.735      |
| Sr-2-CP             | 8.876      | 7.866      | 5.087      | 4.628       | 3.952      | 3.412       | 3.160       | 2.959      | 2.791      | 2.720      |
| Sr-4-CP             | 8.965      | 7.921      | 5.099      | 4.643       | 3.973      | 3.421       | 3.171       | 2.968      | 2.798      | 2.730      |
| Sr-6-CP             | 8.990      | 7.948      | 5.122      | 4.657       | 3.976      | 3.424       | 3.173       | 2.965      | 2.801      | 2.733      |
| Sr-8-CP             | 9.035      | 7.908      | 5.105      | 4.643       | 3.969      | 3.417       | 3.175       | 2.972      | 2.800      | 2.734      |
